# Supplementary material for: Potential association of LMNA-associated generalized lipodystrophy with juvenile dermatomyositis
Source: PubMed Central journal article supplement (PMC5870259; doi:10.1186/s40842-018-0058-3), 2018-03-27
Supplement: 40842_2018_58_MOESM1_ESM.pdf [file 40842_2018_58_MOESM1_ESM.pdf]

KM

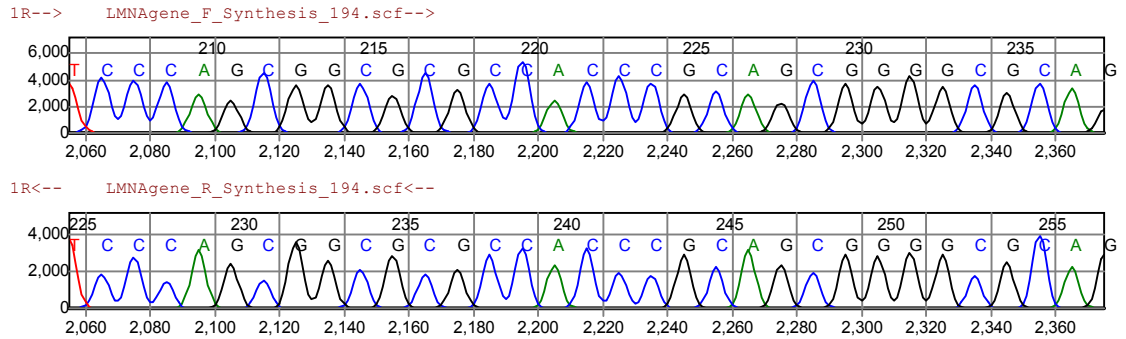

Patient

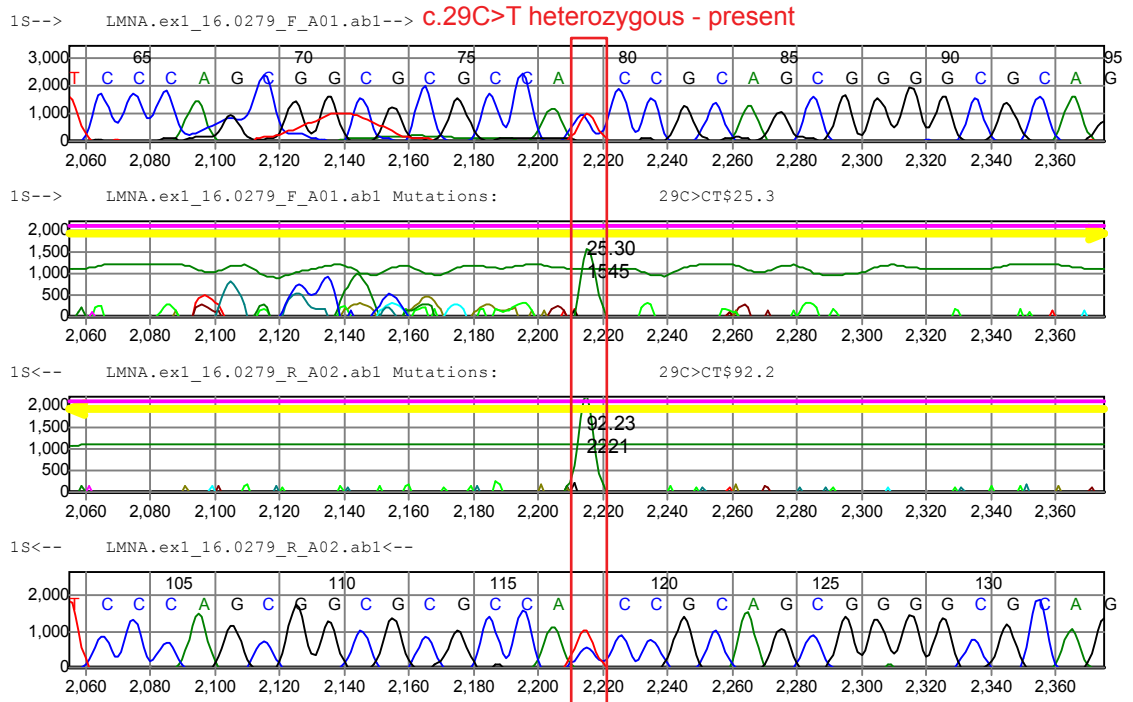

Normal control

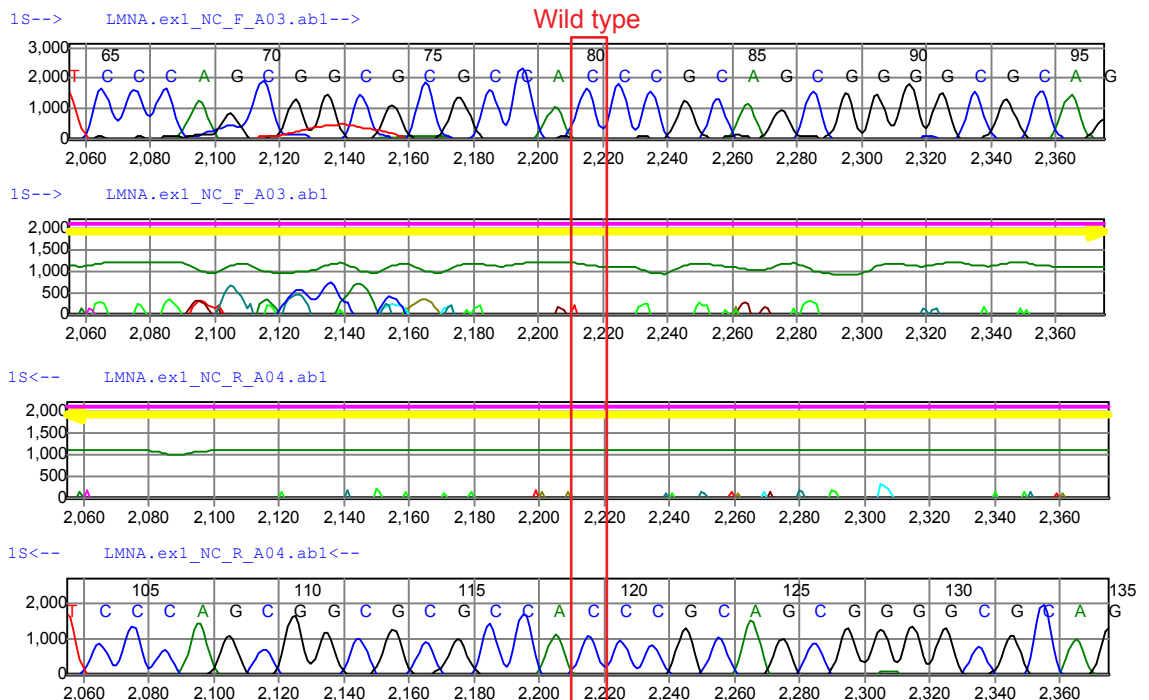

## Appendix 2

| Antibody  | Clone, source and dilution                                            | Retrieval Protocol                                                                                |
|-----------|-----------------------------------------------------------------------|---------------------------------------------------------------------------------------------------|
| MHC1      | HLA-ABC (Clone W6/32)<br>Dako cat# M0736 used at a dilution of 1:1000 | I-View DAB Kit, 44 minutes primary antibody incubation (no heat)                                  |
| LAMIN A/C | (Clone 131C3) Millipore cat# MAB3538 used at a dilution of 1:50       | I-View DAB Kit, 44 minutes primary antibody incubation (no heat)                                  |
| C5b9      | (Clone aE11) Dako cat# M0777 used at a dilution of 1:50               | UltraView DAB Kit, Ultra CC1 36 minutes, 32 minutes primary antibody incubation at 37°C           |
| CD163     | (Clone 10D6) Leica cat# NCL-CD163 used at a dilution of 1:100         | UltraView DAB Kit, Ultra CC1 36 minutes, 32 minutes primary antibody incubation at 37°C           |
| CD3       | (Clone 2GV6) Ventana cat# 790-4341 (pre-dilute)                       | UltraView DAB Kit, Ultra CC1 36 minutes, 28 minutes primary antibody incubation at 36°C           |
| CD20      | (Clone L26) Ventana cat# 760-2531 (pre-dilute)                        | UltraView DAB Kit, Ultra CC1 20 minutes, 32 minute primary antibody incubation at 36°C, UltraWash |

### Appendix 2. Antibodies used for immunohistochemistry
